# Supplementary material
Source: publisher figshare collection journal article supplement (https://acs.figshare.com/ndownloader/files/3945319)
Supplement: Supplementary file 1 [file 3945319]

 
data_c2m 
 
_audit_creation_method            SHELXL-97 
_chemical_name_systematic 
; 
 ? 
; 
_chemical_name_common             ? 
_chemical_melting_point           ? 
_chemical_formula_moiety          ? 
_chemical_formula_sum 
 'Ca2.08 Gd7.92 O10 Sb2.97' 
_chemical_formula_weight          1850.38 
 
loop_ 
 _atom_type_symbol 
 _atom_type_description 
 _atom_type_scat_dispersion_real 
 _atom_type_scat_dispersion_imag 
 _atom_type_scat_source 
 'O'  'O'   0.0106   0.0060 
 'International Tables Vol C Tables 4.2.6.8 and 6.1.1.4' 
 'Ca'  'Ca'   0.2262   0.3064 
 'International Tables Vol C Tables 4.2.6.8 and 6.1.1.4' 
 'Sb'  'Sb'  -0.5866   1.5461 
 'International Tables Vol C Tables 4.2.6.8 and 6.1.1.4' 
 'Gd'  'Gd'  -0.1653   3.9035 
 'International Tables Vol C Tables 4.2.6.8 and 6.1.1.4' 
 
_symmetry_cell_setting            Monoclinic 
_symmetry_space_group_name_H-M    C2/m 
 
loop_ 
 _symmetry_equiv_pos_as_xyz 
 'x, y, z' 
 '-x, y, -z' 
 'x+1/2, y+1/2, z' 
 '-x+1/2, y+1/2, -z' 
 '-x, -y, -z' 
 'x, -y, z' 
 '-x+1/2, -y+1/2, -z' 
 'x+1/2, -y+1/2, z' 
 
_cell_length_a                    13.386(3) 
_cell_length_b                    3.7985(8) 
_cell_length_c                    17.368(4) 
_cell_angle_alpha                 90.00 
_cell_angle_beta                  93.59(3) 
_cell_angle_gamma                 90.00 
_cell_volume                      881.4(3) 
_cell_formula_units_Z             2 
_cell_measurement_temperature     293(2) 
_cell_measurement_reflns_used     14080 
_cell_measurement_theta_min       2.35 
_cell_measurement_theta_max       39.75 
 
_exptl_crystal_description        Block 
_exptl_crystal_colour             Black 
_exptl_crystal_size_max           0.0632 
_exptl_crystal_size_mid           0.0586 
_exptl_crystal_size_min           0.0475 
_exptl_crystal_density_meas       ? 
_exptl_crystal_density_diffrn     6.972 
_exptl_crystal_density_method     'not measured' 
_exptl_crystal_F_000              1559.5 
_exptl_absorpt_coefficient_mu     34.438 
_exptl_absorpt_correction_type    Numerical
_exptl_absorpt_correction_T_min   0.2161 
_exptl_absorpt_correction_T_max   0.3465 
_exptl_absorpt_process_details    X-Red  
 
_exptl_special_details 
; 
A numerical absorption correction was based on 
the crystal shape that was originally derived from 
the optical face indexing but later optimized 
against equivalent reflections using STOE X-Shape 
software  (STOE & Cie GmbH, 2004) 
; 
 
_diffrn_ambient_temperature       293(2) 
_diffrn_radiation_wavelength      0.71073 
_diffrn_radiation_type            MoK\a 
_diffrn_radiation_source          'fine-focus sealed tube' 
_diffrn_radiation_monochromator   graphite 
_diffrn_measurement_device_type   ? 
_diffrn_measurement_method        ? 
_diffrn_detector_area_resol_mean  ? 
_diffrn_reflns_number             14080 
_diffrn_reflns_av_R_equivalents   0.0749 
_diffrn_reflns_av_sigmaI/netI     0.0618 
_diffrn_reflns_limit_h_min        -21 
_diffrn_reflns_limit_h_max        21 
_diffrn_reflns_limit_k_min        -6 
_diffrn_reflns_limit_k_max        6 
_diffrn_reflns_limit_l_min        -27 
_diffrn_reflns_limit_l_max        27 
_diffrn_reflns_theta_min          3.05 
_diffrn_reflns_theta_max          34.56 
_reflns_number_total              2091 
_reflns_number_gt                 1480 
_reflns_threshold_expression      >2sigma(I) 
 
_computing_data_collection        X-Area 
_computing_cell_refinement        X-Area
_computing_data_reduction         X-Red32
_computing_structure_solution     'SHELXS-97 (Sheldrick, 1990)' 
_computing_structure_refinement   'SHELXL-97 (Sheldrick, 1997)' 
_computing_molecular_graphics     ? 
_computing_publication_material   'SHELXL-97 (Sheldrick, 1997)'
 
_refine_special_details 
; 
 Refinement of F^2^ against ALL reflections.  The weighted R-factor wR and 
 goodness of fit S are based on F^2^, conventional R-factors R are based 
 on F, with F set to zero for negative F^2^. The threshold expression of 
 F^2^ > 2sigma(F^2^) is used only for calculating R-factors(gt) etc. and is 
 not relevant to the choice of reflections for refinement.  R-factors based 
 on F^2^ are statistically about twice as large as those based on F, and R- 
 factors based on ALL data will be even larger. 
; 
 
_refine_ls_structure_factor_coef  Fsqd  
_refine_ls_matrix_type            full 
_refine_ls_weighting_scheme       calc  
_refine_ls_weighting_details 
 'calc w=1/[\s^2^(Fo^2^)+(0.0176P)^2^+0.0000P] where P=(Fo^2^+2Fc^2^)/3' 
_atom_sites_solution_primary      direct 
_atom_sites_solution_secondary    difmap 
_atom_sites_solution_hydrogens    'none' 
_refine_ls_hydrogen_treatment     'none'
_refine_ls_extinction_method      SHELXL 
_refine_ls_extinction_coef        0.00054(3) 
_refine_ls_extinction_expression 
 'Fc^*^=kFc[1+0.001xFc^2^\l^3^/sin(2\q)]^-1/4^' 
_refine_ls_number_reflns          2091 
_refine_ls_number_parameters      91 
_refine_ls_number_restraints      0 
_refine_ls_R_factor_all           0.0772 
_refine_ls_R_factor_gt            0.0404 
_refine_ls_wR_factor_ref          0.0590 
_refine_ls_wR_factor_gt           0.0533 
_refine_ls_goodness_of_fit_ref    1.007 
_refine_ls_restrained_S_all       1.007 
_refine_ls_shift/su_max           0.001 
_refine_ls_shift/su_mean          0.000 
 
loop_ 
 _atom_site_label 
 _atom_site_type_symbol 
 _atom_site_fract_x 
 _atom_site_fract_y 
 _atom_site_fract_z 
 _atom_site_U_iso_or_equiv 
 _atom_site_adp_type 
 _atom_site_occupancy 
 _atom_site_symmetry_multiplicity 
 _atom_site_calc_flag 
 _atom_site_refinement_flags 
 _atom_site_disorder_assembly 
 _atom_site_disorder_group 
Ca1 Ca 0.821(2) 0.0000 0.0751(11) 0.0091(3) Uani 0.339(7) 2 d SP . . 
Gd1 Gd 0.8276(2) 0.0000 0.06316(10) 0.0091(3) Uani 0.661(7) 2 d SP . . 
Ca2 Ca 0.1140(11) 0.0000 0.1528(9) 0.0098(3) Uani 0.279(8) 2 d SP . . 
Gd2 Gd 0.09345(9) 0.0000 0.13639(7) 0.0098(3) Uani 0.721(8) 2 d SP . . 
Ca3 Ca 0.421(2) 0.0000 0.2399(17) 0.0110(3) Uani 0.221(7) 2 d SP . . 
Gd3 Gd 0.43708(10) 0.0000 0.24999(10) 0.0110(3) Uani 0.779(7) 2 d SP . . 
Ca4 Ca 0.277(4) 0.0000 0.692(3) 0.0093(2) Uani 0.096(8) 2 d SP . . 
Gd4 Gd 0.29492(7) 0.0000 0.68085(5) 0.0093(2) Uani 0.904(8) 2 d SP . . 
Ca5 Ca 0.360(2) 0.0000 0.491(2) 0.0123(2) Uani 0.106(8) 2 d SP . . 
Gd5 Gd 0.35106(5) 0.0000 0.46483(7) 0.0123(2) Uani 0.894(8) 2 d SP . . 
Sb1 Sb 0.0000 0.5000 0.0000 0.0141(3) Uani 1 4 d S . . 
Sb2 Sb 0.03010(8) 0.0448(9) 0.38925(6) 0.0142(7) Uani 0.492(4) 1 d P . . 
O1 O 0.2360(6) 0.0000 0.0705(4) 0.0136(15) Uani 1 2 d S . . 
O2 O 0.6056(6) 0.0000 0.2071(4) 0.0147(15) Uani 1 2 d S . . 
O3 O 0.0773(6) 0.0000 0.8214(4) 0.0166(16) Uani 1 2 d S . . 
O4 O 0.2917(8) 0.0000 0.3102(7) 0.035(3) Uani 1 2 d S . . 
O5 O 0.2343(5) 0.0000 0.5571(4) 0.0108(13) Uani 1 2 d S . . 
 
loop_ 
 _atom_site_aniso_label 
 _atom_site_aniso_U_11 
 _atom_site_aniso_U_22 
 _atom_site_aniso_U_33 
 _atom_site_aniso_U_23 
 _atom_site_aniso_U_13 
 _atom_site_aniso_U_12 
Ca1 0.0106(6) 0.0084(4) 0.0082(8) 0.000 -0.0011(5) 0.000 
Gd1 0.0106(6) 0.0084(4) 0.0082(8) 0.000 -0.0011(5) 0.000 
Ca2 0.0116(6) 0.0082(4) 0.0099(5) 0.000 0.0017(3) 0.000 
Gd2 0.0116(6) 0.0082(4) 0.0099(5) 0.000 0.0017(3) 0.000 
Ca3 0.0104(7) 0.0077(3) 0.0151(6) 0.000 0.0034(3) 0.000 
Gd3 0.0104(7) 0.0077(3) 0.0151(6) 0.000 0.0034(3) 0.000 
Ca4 0.0104(5) 0.0071(3) 0.0102(4) 0.000 -0.0020(2) 0.000 
Gd4 0.0104(5) 0.0071(3) 0.0102(4) 0.000 -0.0020(2) 0.000 
Ca5 0.0084(4) 0.0090(3) 0.0198(5) 0.000 0.0040(3) 0.000 
Gd5 0.0084(4) 0.0090(3) 0.0198(5) 0.000 0.0040(3) 0.000 
Sb1 0.0112(6) 0.0198(6) 0.0114(6) 0.000 0.0018(4) 0.000 
Sb2 0.0106(5) 0.0185(19) 0.0136(5) -0.0030(5) 0.0008(3) -0.0020(5) 
O1 0.014(4) 0.014(4) 0.012(3) 0.000 0.002(3) 0.000 
O2 0.019(4) 0.016(4) 0.008(3) 0.000 -0.007(3) 0.000 
O3 0.017(4) 0.015(4) 0.017(4) 0.000 -0.002(3) 0.000 
O4 0.024(5) 0.019(5) 0.065(7) 0.000 0.022(5) 0.000 
O5 0.009(3) 0.010(3) 0.013(3) 0.000 0.000(2) 0.000 
 
_geom_special_details 
; 
 All esds (except the esd in the dihedral angle between two l.s. planes) 
 are estimated using the full covariance matrix.  The cell esds are taken 
 into account individually in the estimation of esds in distances, angles 
 and torsion angles; correlations between esds in cell parameters are only 
 used when they are defined by crystal symmetry.  An approximate (isotropic) 
 treatment of cell esds is used for estimating esds involving l.s. planes. 
; 
 
loop_ 
 _geom_bond_atom_site_label_1 
 _geom_bond_atom_site_label_2 
 _geom_bond_distance 
 _geom_bond_site_symmetry_2 
 _geom_bond_publ_flag 
Ca1 O3 2.18(3) 5_656 ? 
Ca1 O1 2.216(14) 3_545 ? 
Ca1 O1 2.216(14) 3 ? 
Ca1 O1 2.60(2) 5_655 ? 
Ca1 Sb1 3.378(18) 1_655 ? 
Ca1 Sb1 3.378(18) 1_645 ? 
Ca1 Gd1 3.57(2) 7_645 ? 
Ca1 Gd1 3.57(2) 7_655 ? 
Ca1 Ca3 3.62(3) 3 ? 
Ca1 Ca3 3.62(3) 3_545 ? 
Ca1 Ca1 3.67(4) 7_645 ? 
Ca1 Ca1 3.67(4) 7_655 ? 
Gd1 O1 2.268(5) 3_545 ? 
Gd1 O1 2.268(5) 3 ? 
Gd1 O3 2.307(8) 5_656 ? 
Gd1 O1 2.423(8) 5_655 ? 
Gd1 Sb1 3.2335(19) 1_655 ? 
Gd1 Sb1 3.2335(19) 1_645 ? 
Gd1 Gd1 3.488(5) 7_645 ? 
Gd1 Gd1 3.488(5) 7_655 ? 
Gd1 Ca1 3.57(2) 7_645 ? 
Gd1 Ca1 3.57(2) 7_655 ? 
Gd1 Gd2 3.686(2) 5_655 ? 
Gd1 Gd2 3.704(3) 1_655 ? 
Ca2 O2 2.126(8) 3_455 ? 
Ca2 O2 2.126(8) 3_445 ? 
Ca2 O1 2.237(17) . ? 
Ca2 O3 2.627(17) 5_556 ? 
Ca2 Sb1 3.532(13) 1_545 ? 
Ca2 Sb1 3.532(13) . ? 
Ca2 Ca4 3.54(5) 7_556 ? 
Ca2 Ca4 3.54(5) 7_546 ? 
Ca2 Gd3 3.545(13) 3_445 ? 
Ca2 Gd3 3.545(13) 3_455 ? 
Ca2 Gd4 3.605(13) 7_556 ? 
Ca2 Gd4 3.605(13) 7_546 ? 
Gd2 O2 2.262(4) 3_455 ? 
Gd2 O2 2.262(4) 3_445 ? 
Gd2 O1 2.286(8) . ? 
Gd2 O3 2.444(8) 5_556 ? 
Gd2 Sb1 3.2269(12) 1_545 ? 
Gd2 Sb1 3.2269(12) . ? 
Gd2 Gd3 3.5210(19) 3_445 ? 
Gd2 Gd3 3.5210(19) 3_455 ? 
Gd2 Ca3 3.56(3) 3_445 ? 
Gd2 Ca3 3.56(3) 3_455 ? 
Gd2 Gd1 3.686(2) 5_655 ? 
Gd2 Gd1 3.704(3) 1_455 ? 
Ca3 O3 2.178(15) 7_546 ? 
Ca3 O3 2.178(15) 7_556 ? 
Ca3 O4 2.18(3) . ? 
Ca3 O2 2.57(3) . ? 
Ca3 Sb2 3.37(2) 8 ? 
Ca3 Sb2 3.37(2) 3_545 ? 
Ca3 Ca4 3.53(5) 7_546 ? 
Ca3 Ca4 3.53(5) 7_556 ? 
Ca3 Sb2 3.56(2) 3 ? 
Ca3 Sb2 3.56(2) 8_545 ? 
Ca3 Gd2 3.56(3) 3 ? 
Ca3 Gd2 3.56(3) 3_545 ? 
Gd3 O4 2.266(10) . ? 
Gd3 O3 2.270(4) 7_546 ? 
Gd3 O3 2.270(4) 7_556 ? 
Gd3 O2 2.420(9) . ? 
Gd3 Sb2 3.165(3) 8 ? 
Gd3 Sb2 3.165(2) 3_545 ? 
Gd3 Sb2 3.363(3) 3 ? 
Gd3 Sb2 3.363(3) 8_545 ? 
Gd3 Gd2 3.5210(19) 3 ? 
Gd3 Gd2 3.5210(19) 3_545 ? 
Gd3 Ca2 3.545(13) 3 ? 
Gd3 Ca2 3.545(13) 3_545 ? 
Ca4 O4 2.11(2) 7_546 ? 
Ca4 O4 2.11(2) 7_556 ? 
Ca4 O2 2.28(6) 5_656 ? 
Ca4 O5 2.37(6) . ? 
Ca4 Sb2 3.48(4) 7_556 ? 
Ca4 Sb2 3.48(4) 4_546 ? 
Ca4 Ca3 3.53(5) 7_546 ? 
Ca4 Ca3 3.53(5) 7_556 ? 
Ca4 Ca2 3.54(5) 7_556 ? 
Ca4 Ca2 3.54(5) 7_546 ? 
Ca4 Gd3 3.64(4) 7_546 ? 
Ca4 Gd3 3.64(4) 7_556 ? 
Gd4 O4 2.235(5) 7_546 ? 
Gd4 O4 2.235(5) 7_556 ? 
Gd4 O5 2.249(7) . ? 
Gd4 O2 2.288(7) 5_656 ? 
Gd4 Sb2 3.212(2) 7_556 ? 
Gd4 Sb2 3.212(2) 4_546 ? 
Gd4 Sb2 3.407(3) 4_556 ? 
Gd4 Sb2 3.407(3) 7_546 ? 
Gd4 Ca5 3.46(4) . ? 
Gd4 Ca2 3.605(13) 7_556 ? 
Gd4 Ca2 3.605(13) 7_546 ? 
Gd4 Gd5 3.6344(16) 7_546 ? 
Ca5 O5 2.10(3) . ? 
Ca5 O5 2.40(2) 7_546 ? 
Ca5 O5 2.40(2) 7_556 ? 
Ca5 Sb2 3.01(3) 7_556 ? 
Ca5 Sb2 3.01(3) 4_546 ? 
Ca5 Sb2 3.22(3) 4_556 ? 
Ca5 Sb2 3.22(3) 7_546 ? 
Ca5 Sb2 3.43(3) 8 ? 
Ca5 Sb2 3.43(3) 3_545 ? 
Ca5 Gd5 3.53(2) 7_546 ? 
Ca5 Gd5 3.53(2) 7_556 ? 
Gd5 O5 2.237(4) 7_546 ? 
Gd5 O5 2.237(4) 7_556 ? 
Gd5 O5 2.307(7) . ? 
Gd5 O4 2.753(13) . ? 
Gd5 Sb2 3.294(2) 8 ? 
Gd5 Sb2 3.294(2) 3_545 ? 
Gd5 Sb2 3.382(2) 7_556 ? 
Gd5 Sb2 3.382(2) 4_546 ? 
Gd5 Sb2 3.485(3) 3 ? 
Gd5 Sb2 3.485(2) 8_545 ? 
Gd5 Ca5 3.53(2) 7_546 ? 
Gd5 Ca5 3.53(2) 7_556 ? 
Sb1 Gd2 3.2269(12) 5 ? 
Sb1 Gd2 3.2269(12) 1_565 ? 
Sb1 Gd2 3.2269(12) 5_565 ? 
Sb1 Gd1 3.2335(19) 5_665 ? 
Sb1 Gd1 3.2335(19) 1_455 ? 
Sb1 Gd1 3.2335(19) 5_655 ? 
Sb1 Gd1 3.2335(19) 1_465 ? 
Sb1 Ca1 3.378(18) 1_455 ? 
Sb1 Ca1 3.378(18) 5_665 ? 
Sb1 Ca1 3.378(18) 5_655 ? 
Sb1 Ca1 3.378(18) 1_465 ? 
Sb2 Ca5 3.01(3) 7_556 ? 
Sb2 Gd3 3.165(2) 3_455 ? 
Sb2 Gd4 3.212(2) 7_556 ? 
Sb2 Ca5 3.22(3) 7_546 ? 
Sb2 Gd5 3.294(2) 3_455 ? 
Sb2 Gd3 3.363(3) 3_445 ? 
Sb2 Ca3 3.37(2) 3_455 ? 
Sb2 Gd5 3.382(2) 7_556 ? 
Sb2 Gd4 3.407(3) 7_546 ? 
Sb2 Ca5 3.43(3) 3_455 ? 
Sb2 Ca4 3.48(4) 7_556 ? 
Sb2 Gd5 3.485(2) 3_445 ? 
O1 Ca1 2.216(14) 3_455 ? 
O1 Ca1 2.216(14) 3_445 ? 
O1 Gd1 2.268(5) 3_455 ? 
O1 Gd1 2.268(5) 3_445 ? 
O1 Gd1 2.423(8) 5_655 ? 
O1 Ca1 2.60(2) 5_655 ? 
O2 Ca2 2.126(8) 3_545 ? 
O2 Ca2 2.126(8) 3 ? 
O2 Gd2 2.262(4) 3_545 ? 
O2 Gd2 2.262(4) 3 ? 
O2 Ca4 2.28(6) 5_656 ? 
O2 Gd4 2.288(7) 5_656 ? 
O3 Ca3 2.178(15) 7_546 ? 
O3 Ca3 2.178(15) 7_556 ? 
O3 Ca1 2.18(3) 5_656 ? 
O3 Gd3 2.270(4) 7_546 ? 
O3 Gd3 2.270(4) 7_556 ? 
O3 Gd1 2.307(8) 5_656 ? 
O3 Gd2 2.444(8) 5_556 ? 
O3 Ca2 2.627(17) 5_556 ? 
O4 Ca4 2.11(2) 7_546 ? 
O4 Ca4 2.11(2) 7_556 ? 
O4 Gd4 2.235(5) 7_546 ? 
O4 Gd4 2.235(5) 7_556 ? 
O5 Gd5 2.237(4) 7_546 ? 
O5 Gd5 2.237(4) 7_556 ? 
O5 Ca5 2.40(2) 7_546 ? 
O5 Ca5 2.40(2) 7_556 ? 
 
loop_ 
 _geom_angle_atom_site_label_1 
 _geom_angle_atom_site_label_2 
 _geom_angle_atom_site_label_3 
 _geom_angle 
 _geom_angle_site_symmetry_1 
 _geom_angle_site_symmetry_3 
 _geom_angle_publ_flag 
O3 Ca1 O1 108.8(6) 5_656 3_545 ? 
O3 Ca1 O1 108.8(6) 5_656 3 ? 
O1 Ca1 O1 118.0(12) 3_545 3 ? 
O3 Ca1 O1 158.9(11) 5_656 5_655 ? 
O1 Ca1 O1 81.0(7) 3_545 5_655 ? 
O1 Ca1 O1 81.0(7) 3 5_655 ? 
O3 Ca1 Sb1 84.3(7) 5_656 1_655 ? 
O1 Ca1 Sb1 147.6(6) 3_545 1_655 ? 
O1 Ca1 Sb1 83.1(3) 3 1_655 ? 
O1 Ca1 Sb1 78.3(4) 5_655 1_655 ? 
O3 Ca1 Sb1 84.3(7) 5_656 1_645 ? 
O1 Ca1 Sb1 83.1(3) 3_545 1_645 ? 
O1 Ca1 Sb1 147.6(6) 3 1_645 ? 
O1 Ca1 Sb1 78.3(4) 5_655 1_645 ? 
Sb1 Ca1 Sb1 68.4(4) 1_655 1_645 ? 
O3 Ca1 Gd1 147.76(18) 5_656 7_645 ? 
O1 Ca1 Gd1 41.8(4) 3_545 7_645 ? 
O1 Ca1 Gd1 99.6(9) 3 7_645 ? 
O1 Ca1 Gd1 39.3(3) 5_655 7_645 ? 
Sb1 Ca1 Gd1 114.7(5) 1_655 7_645 ? 
Sb1 Ca1 Gd1 79.6(3) 1_645 7_645 ? 
O3 Ca1 Gd1 147.76(18) 5_656 7_655 ? 
O1 Ca1 Gd1 99.6(9) 3_545 7_655 ? 
O1 Ca1 Gd1 41.8(4) 3 7_655 ? 
O1 Ca1 Gd1 39.3(3) 5_655 7_655 ? 
Sb1 Ca1 Gd1 79.6(3) 1_655 7_655 ? 
Sb1 Ca1 Gd1 114.7(5) 1_645 7_655 ? 
Gd1 Ca1 Gd1 64.3(4) 7_645 7_655 ? 
O3 Ca1 Ca3 33.8(3) 5_656 3 ? 
O1 Ca1 Ca3 130.0(8) 3_545 3 ? 
O1 Ca1 Ca3 75.1(5) 3 3 ? 
O1 Ca1 Ca3 147.4(4) 5_655 3 ? 
Sb1 Ca1 Ca3 77.0(6) 1_655 3 ? 
Sb1 Ca1 Ca3 111.4(9) 1_645 3 ? 
Gd1 Ca1 Ca3 166.8(9) 7_645 3 ? 
Gd1 Ca1 Ca3 114.6(3) 7_655 3 ? 
O3 Ca1 Ca3 33.8(3) 5_656 3_545 ? 
O1 Ca1 Ca3 75.1(5) 3_545 3_545 ? 
O1 Ca1 Ca3 130.0(8) 3 3_545 ? 
O1 Ca1 Ca3 147.4(4) 5_655 3_545 ? 
Sb1 Ca1 Ca3 111.4(9) 1_655 3_545 ? 
Sb1 Ca1 Ca3 77.0(6) 1_645 3_545 ? 
Gd1 Ca1 Ca3 114.6(3) 7_645 3_545 ? 
Gd1 Ca1 Ca3 166.8(9) 7_655 3_545 ? 
Ca3 Ca1 Ca3 63.3(6) 3 3_545 ? 
O3 Ca1 Ca1 148.8(4) 5_656 7_645 ? 
O1 Ca1 Ca1 44.4(4) 3_545 7_645 ? 
O1 Ca1 Ca1 100.0(11) 3 7_645 ? 
O1 Ca1 Ca1 36.6(4) 5_655 7_645 ? 
Sb1 Ca1 Ca1 111.5(7) 1_655 7_645 ? 
Sb1 Ca1 Ca1 77.5(4) 1_645 7_645 ? 
Gd1 Ca1 Ca1 3.3(3) 7_645 7_645 ? 
Gd1 Ca1 Ca1 63.4(6) 7_655 7_645 ? 
Ca3 Ca1 Ca1 169.9(12) 3 7_645 ? 
Ca3 Ca1 Ca1 116.2(3) 3_545 7_645 ? 
O3 Ca1 Ca1 148.8(4) 5_656 7_655 ? 
O1 Ca1 Ca1 100.0(11) 3_545 7_655 ? 
O1 Ca1 Ca1 44.4(4) 3 7_655 ? 
O1 Ca1 Ca1 36.6(4) 5_655 7_655 ? 
Sb1 Ca1 Ca1 77.5(4) 1_655 7_655 ? 
Sb1 Ca1 Ca1 111.5(7) 1_645 7_655 ? 
Gd1 Ca1 Ca1 63.4(6) 7_645 7_655 ? 
Gd1 Ca1 Ca1 3.3(3) 7_655 7_655 ? 
Ca3 Ca1 Ca1 116.2(3) 3 7_655 ? 
Ca3 Ca1 Ca1 169.9(12) 3_545 7_655 ? 
Ca1 Ca1 Ca1 62.4(8) 7_645 7_655 ? 
O1 Gd1 O1 113.7(4) 3_545 3 ? 
O1 Gd1 O3 102.8(2) 3_545 5_656 ? 
O1 Gd1 O3 102.8(2) 3 5_656 ? 
O1 Gd1 O1 84.0(2) 3_545 5_655 ? 
O1 Gd1 O1 84.0(2) 3 5_655 ? 
O3 Gd1 O1 167.1(3) 5_656 5_655 ? 
O1 Gd1 Sb1 155.59(18) 3_545 1_655 ? 
O1 Gd1 Sb1 85.81(17) 3 1_655 ? 
O3 Gd1 Sb1 85.87(18) 5_656 1_655 ? 
O1 Gd1 Sb1 83.70(15) 5_655 1_655 ? 
O1 Gd1 Sb1 85.81(17) 3_545 1_645 ? 
O1 Gd1 Sb1 155.59(18) 3 1_645 ? 
O3 Gd1 Sb1 85.87(18) 5_656 1_645 ? 
O1 Gd1 Sb1 83.70(15) 5_655 1_645 ? 
Sb1 Gd1 Sb1 71.94(5) 1_655 1_645 ? 
O1 Gd1 Gd1 43.70(19) 3_545 7_645 ? 
O1 Gd1 Gd1 100.9(2) 3 7_645 ? 
O3 Gd1 Gd1 145.22(7) 5_656 7_645 ? 
O1 Gd1 Gd1 40.30(11) 5_655 7_645 ? 
Sb1 Gd1 Gd1 121.06(6) 1_655 7_645 ? 
Sb1 Gd1 Gd1 82.89(4) 1_645 7_645 ? 
O1 Gd1 Gd1 100.9(2) 3_545 7_655 ? 
O1 Gd1 Gd1 43.70(19) 3 7_655 ? 
O3 Gd1 Gd1 145.22(7) 5_656 7_655 ? 
O1 Gd1 Gd1 40.30(11) 5_655 7_655 ? 
Sb1 Gd1 Gd1 82.89(4) 1_655 7_655 ? 
Sb1 Gd1 Gd1 121.06(6) 1_645 7_655 ? 
Gd1 Gd1 Gd1 65.99(10) 7_645 7_655 ? 
O1 Gd1 Ca1 46.5(3) 3_545 7_645 ? 
O1 Gd1 Ca1 101.7(3) 3 7_645 ? 
O3 Gd1 Ca1 147.05(19) 5_656 7_645 ? 
O1 Gd1 Ca1 37.6(2) 5_655 7_645 ? 
Sb1 Gd1 Ca1 117.7(3) 1_655 7_645 ? 
Sb1 Gd1 Ca1 80.8(3) 1_645 7_645 ? 
Gd1 Gd1 Ca1 3.4(3) 7_645 7_645 ? 
Gd1 Gd1 Ca1 65.23(16) 7_655 7_645 ? 
O1 Gd1 Ca1 101.7(3) 3_545 7_655 ? 
O1 Gd1 Ca1 46.5(3) 3 7_655 ? 
O3 Gd1 Ca1 147.05(19) 5_656 7_655 ? 
O1 Gd1 Ca1 37.6(2) 5_655 7_655 ? 
Sb1 Gd1 Ca1 80.8(3) 1_655 7_655 ? 
Sb1 Gd1 Ca1 117.7(3) 1_645 7_655 ? 
Gd1 Gd1 Ca1 65.23(16) 7_645 7_655 ? 
Gd1 Gd1 Ca1 3.4(3) 7_655 7_655 ? 
Ca1 Gd1 Ca1 64.3(4) 7_645 7_655 ? 
O1 Gd1 Gd2 103.94(19) 3_545 5_655 ? 
O1 Gd1 Gd2 103.94(19) 3 5_655 ? 
O3 Gd1 Gd2 129.9(2) 5_656 5_655 ? 
O1 Gd1 Gd2 37.16(19) 5_655 5_655 ? 
Sb1 Gd1 Gd2 55.12(3) 1_655 5_655 ? 
Sb1 Gd1 Gd2 55.12(3) 1_645 5_655 ? 
Gd1 Gd1 Gd2 66.61(5) 7_645 5_655 ? 
Gd1 Gd1 Gd2 66.61(5) 7_655 5_655 ? 
Ca1 Gd1 Gd2 63.2(3) 7_645 5_655 ? 
Ca1 Gd1 Gd2 63.2(3) 7_655 5_655 ? 
O1 Gd1 Gd2 119.44(19) 3_545 1_655 ? 
O1 Gd1 Gd2 119.44(19) 3 1_655 ? 
O3 Gd1 Gd2 40.1(2) 5_656 1_655 ? 
O1 Gd1 Gd2 127.0(2) 5_655 1_655 ? 
Sb1 Gd1 Gd2 54.94(4) 1_655 1_655 ? 
Sb1 Gd1 Gd2 54.94(4) 1_645 1_655 ? 
Gd1 Gd1 Gd2 137.53(7) 7_645 1_655 ? 
Gd1 Gd1 Gd2 137.53(7) 7_655 1_655 ? 
Ca1 Gd1 Gd2 135.7(3) 7_645 1_655 ? 
Ca1 Gd1 Gd2 135.7(3) 7_655 1_655 ? 
Gd2 Gd1 Gd2 89.82(6) 5_655 1_655 ? 
O2 Ca2 O2 126.6(8) 3_455 3_445 ? 
O2 Ca2 O1 110.1(5) 3_455 . ? 
O2 Ca2 O1 110.1(5) 3_445 . ? 
O2 Ca2 O3 81.1(5) 3_455 5_556 ? 
O2 Ca2 O3 81.1(5) 3_445 5_556 ? 
O1 Ca2 O3 150.1(8) . 5_556 ? 
O2 Ca2 Sb1 141.3(6) 3_455 1_545 ? 
O2 Ca2 Sb1 79.7(3) 3_445 1_545 ? 
O1 Ca2 Sb1 79.5(4) . 1_545 ? 
O3 Ca2 Sb1 75.4(4) 5_556 1_545 ? 
O2 Ca2 Sb1 79.7(3) 3_455 . ? 
O2 Ca2 Sb1 141.3(6) 3_445 . ? 
O1 Ca2 Sb1 79.5(4) . . ? 
O3 Ca2 Sb1 75.4(4) 5_556 . ? 
Sb1 Ca2 Sb1 65.0(3) 1_545 . ? 
O2 Ca2 Ca4 38.1(6) 3_455 7_556 ? 
O2 Ca2 Ca4 99.9(8) 3_445 7_556 ? 
O1 Ca2 Ca4 101.9(9) . 7_556 ? 
O3 Ca2 Ca4 103.2(9) 5_556 7_556 ? 
Sb1 Ca2 Ca4 178.6(9) 1_545 7_556 ? 
Sb1 Ca2 Ca4 115.0(5) . 7_556 ? 
O2 Ca2 Ca4 99.9(8) 3_455 7_546 ? 
O2 Ca2 Ca4 38.1(6) 3_445 7_546 ? 
O1 Ca2 Ca4 101.9(9) . 7_546 ? 
O3 Ca2 Ca4 103.2(9) 5_556 7_546 ? 
Sb1 Ca2 Ca4 115.0(5) 1_545 7_546 ? 
Sb1 Ca2 Ca4 178.6(9) . 7_546 ? 
Ca4 Ca2 Ca4 65.0(10) 7_556 7_546 ? 
O2 Ca2 Gd3 102.3(6) 3_455 3_445 ? 
O2 Ca2 Gd3 41.8(3) 3_445 3_445 ? 
O1 Ca2 Gd3 147.20(17) . 3_445 ? 
O3 Ca2 Gd3 39.8(2) 5_556 3_445 ? 
Sb1 Ca2 Gd3 78.4(2) 1_545 3_445 ? 
Sb1 Ca2 Gd3 112.1(4) . 3_445 ? 
Ca4 Ca2 Gd3 100.4(8) 7_556 3_445 ? 
Ca4 Ca2 Gd3 66.7(8) 7_546 3_445 ? 
O2 Ca2 Gd3 41.8(3) 3_455 3_455 ? 
O2 Ca2 Gd3 102.3(6) 3_445 3_455 ? 
O1 Ca2 Gd3 147.20(17) . 3_455 ? 
O3 Ca2 Gd3 39.8(2) 5_556 3_455 ? 
Sb1 Ca2 Gd3 112.1(4) 1_545 3_455 ? 
Sb1 Ca2 Gd3 78.4(2) . 3_455 ? 
Ca4 Ca2 Gd3 66.7(8) 7_556 3_455 ? 
Ca4 Ca2 Gd3 100.4(8) 7_546 3_455 ? 
Gd3 Ca2 Gd3 64.8(3) 3_445 3_455 ? 
O2 Ca2 Gd4 36.8(3) 3_455 7_556 ? 
O2 Ca2 Gd4 98.1(5) 3_445 7_556 ? 
O1 Ca2 Gd4 106.8(5) . 7_556 ? 
O3 Ca2 Gd4 98.5(4) 5_556 7_556 ? 
Sb1 Ca2 Gd4 173.7(5) 1_545 7_556 ? 
Sb1 Ca2 Gd4 115.30(5) . 7_556 ? 
Ca4 Ca2 Gd4 4.9(8) 7_556 7_556 ? 
Ca4 Ca2 Gd4 64.5(6) 7_546 7_556 ? 
Gd3 Ca2 Gd4 95.9(4) 3_445 7_556 ? 
Gd3 Ca2 Gd4 62.5(2) 3_455 7_556 ? 
O2 Ca2 Gd4 98.1(5) 3_455 7_546 ? 
O2 Ca2 Gd4 36.8(3) 3_445 7_546 ? 
O1 Ca2 Gd4 106.8(5) . 7_546 ? 
O3 Ca2 Gd4 98.5(4) 5_556 7_546 ? 
Sb1 Ca2 Gd4 115.30(5) 1_545 7_546 ? 
Sb1 Ca2 Gd4 173.7(5) . 7_546 ? 
Ca4 Ca2 Gd4 64.5(6) 7_556 7_546 ? 
Ca4 Ca2 Gd4 4.9(8) 7_546 7_546 ? 
Gd3 Ca2 Gd4 62.5(2) 3_445 7_546 ? 
Gd3 Ca2 Gd4 95.9(4) 3_455 7_546 ? 
Gd4 Ca2 Gd4 63.6(3) 7_556 7_546 ? 
O2 Gd2 O2 114.2(3) 3_455 3_445 ? 
O2 Gd2 O1 103.7(2) 3_455 . ? 
O2 Gd2 O1 103.7(2) 3_445 . ? 
O2 Gd2 O3 82.8(2) 3_455 5_556 ? 
O2 Gd2 O3 82.8(2) 3_445 5_556 ? 
O1 Gd2 O3 167.5(3) . 5_556 ? 
O2 Gd2 Sb1 154.72(17) 3_455 1_545 ? 
O2 Gd2 Sb1 85.17(15) 3_445 1_545 ? 
O1 Gd2 Sb1 85.99(15) . 1_545 ? 
O3 Gd2 Sb1 83.87(15) 5_556 1_545 ? 
O2 Gd2 Sb1 85.17(15) 3_455 . ? 
O2 Gd2 Sb1 154.72(17) 3_445 . ? 
O1 Gd2 Sb1 85.99(15) . . ? 
O3 Gd2 Sb1 83.87(15) 5_556 . ? 
Sb1 Gd2 Sb1 72.11(3) 1_545 . ? 
O2 Gd2 Gd3 100.02(19) 3_455 3_445 ? 
O2 Gd2 Gd3 43.0(2) 3_445 3_445 ? 
O1 Gd2 Gd3 145.56(6) . 3_445 ? 
O3 Gd2 Gd3 39.82(10) 5_556 3_445 ? 
Sb1 Gd2 Gd3 82.94(3) 1_545 3_445 ? 
Sb1 Gd2 Gd3 120.80(4) . 3_445 ? 
O2 Gd2 Gd3 43.0(2) 3_455 3_455 ? 
O2 Gd2 Gd3 100.02(19) 3_445 3_455 ? 
O1 Gd2 Gd3 145.56(6) . 3_455 ? 
O3 Gd2 Gd3 39.82(10) 5_556 3_455 ? 
Sb1 Gd2 Gd3 120.80(4) 1_545 3_455 ? 
Sb1 Gd2 Gd3 82.94(3) . 3_455 ? 
Gd3 Gd2 Gd3 65.29(4) 3_445 3_455 ? 
O2 Gd2 Ca3 101.6(4) 3_455 3_445 ? 
O2 Gd2 Ca3 46.0(4) 3_445 3_445 ? 
O1 Gd2 Ca3 147.1(3) . 3_445 ? 
O3 Gd2 Ca3 37.0(3) 5_556 3_445 ? 
Sb1 Gd2 Ca3 79.8(4) 1_545 3_445 ? 
Sb1 Gd2 Ca3 116.8(4) . 3_445 ? 
Gd3 Gd2 Ca3 4.3(4) 3_445 3_445 ? 
Gd3 Gd2 Ca3 65.1(3) 3_455 3_445 ? 
O2 Gd2 Ca3 46.0(4) 3_455 3_455 ? 
O2 Gd2 Ca3 101.6(4) 3_445 3_455 ? 
O1 Gd2 Ca3 147.1(3) . 3_455 ? 
O3 Gd2 Ca3 37.0(3) 5_556 3_455 ? 
Sb1 Gd2 Ca3 116.8(4) 1_545 3_455 ? 
Sb1 Gd2 Ca3 79.8(4) . 3_455 ? 
Gd3 Gd2 Ca3 65.1(3) 3_445 3_455 ? 
Gd3 Gd2 Ca3 4.3(4) 3_455 3_455 ? 
Ca3 Gd2 Ca3 64.5(6) 3_445 3_455 ? 
O2 Gd2 Gd1 119.68(18) 3_455 5_655 ? 
O2 Gd2 Gd1 119.68(18) 3_445 5_655 ? 
O1 Gd2 Gd1 39.82(19) . 5_655 ? 
O3 Gd2 Gd1 127.64(19) 5_556 5_655 ? 
Sb1 Gd2 Gd1 55.29(4) 1_545 5_655 ? 
Sb1 Gd2 Gd1 55.29(4) . 5_655 ? 
Gd3 Gd2 Gd1 137.93(4) 3_445 5_655 ? 
Gd3 Gd2 Gd1 137.93(4) 3_455 5_655 ? 
Ca3 Gd2 Gd1 135.0(4) 3_445 5_655 ? 
Ca3 Gd2 Gd1 135.0(4) 3_455 5_655 ? 
O2 Gd2 Gd1 102.8(2) 3_455 1_455 ? 
O2 Gd2 Gd1 102.8(2) 3_445 1_455 ? 
O1 Gd2 Gd1 130.00(19) . 1_455 ? 
O3 Gd2 Gd1 37.46(18) 5_556 1_455 ? 
Sb1 Gd2 Gd1 55.10(3) 1_545 1_455 ? 
Sb1 Gd2 Gd1 55.10(3) . 1_455 ? 
Gd3 Gd2 Gd1 66.44(4) 3_445 1_455 ? 
Gd3 Gd2 Gd1 66.44(4) 3_455 1_455 ? 
Ca3 Gd2 Gd1 62.3(4) 3_445 1_455 ? 
Ca3 Gd2 Gd1 62.3(4) 3_455 1_455 ? 
Gd1 Gd2 Gd1 90.18(6) 5_655 1_455 ? 
O3 Ca3 O3 121.4(14) 7_546 7_556 ? 
O3 Ca3 O4 107.7(9) 7_546 . ? 
O3 Ca3 O4 107.7(9) 7_556 . ? 
O3 Ca3 O2 81.6(9) 7_546 . ? 
O3 Ca3 O2 81.6(9) 7_556 . ? 
O4 Ca3 O2 158.9(13) . . ? 
O3 Ca3 Sb2 143.8(9) 7_546 8 ? 
O3 Ca3 Sb2 85.0(4) 7_556 8 ? 
O4 Ca3 Sb2 83.7(9) . 8 ? 
O2 Ca3 Sb2 78.2(6) . 8 ? 
O3 Ca3 Sb2 85.0(4) 7_546 3_545 ? 
O3 Ca3 Sb2 143.8(9) 7_556 3_545 ? 
O4 Ca3 Sb2 83.7(9) . 3_545 ? 
O2 Ca3 Sb2 78.2(6) . 3_545 ? 
Sb2 Ca3 Sb2 61.7(5) 8 3_545 ? 
O3 Ca3 Ca4 74.0(7) 7_546 7_546 ? 
O3 Ca3 Ca4 131.5(12) 7_556 7_546 ? 
O4 Ca3 Ca4 34.0(6) . 7_546 ? 
O2 Ca3 Ca4 146.0(6) . 7_546 ? 
Sb2 Ca3 Ca4 108.4(13) 8 7_546 ? 
Sb2 Ca3 Ca4 76.3(10) 3_545 7_546 ? 
O3 Ca3 Ca4 131.5(12) 7_546 7_556 ? 
O3 Ca3 Ca4 74.0(7) 7_556 7_556 ? 
O4 Ca3 Ca4 34.0(6) . 7_556 ? 
O2 Ca3 Ca4 146.0(6) . 7_556 ? 
Sb2 Ca3 Ca4 76.3(10) 8 7_556 ? 
Sb2 Ca3 Ca4 108.4(13) 3_545 7_556 ? 
Ca4 Ca3 Ca4 65.1(10) 7_546 7_556 ? 
O3 Ca3 Sb2 148.0(9) 7_546 3 ? 
O3 Ca3 Sb2 80.4(4) 7_556 3 ? 
O4 Ca3 Sb2 84.0(8) . 3 ? 
O2 Ca3 Sb2 78.8(5) . 3 ? 
Sb2 Ca3 Sb2 4.71(10) 8 3 ? 
Sb2 Ca3 Sb2 66.4(5) 3_545 3 ? 
Ca4 Ca3 Sb2 110.5(13) 7_546 3 ? 
Ca4 Ca3 Sb2 74.0(10) 7_556 3 ? 
O3 Ca3 Sb2 80.4(4) 7_546 8_545 ? 
O3 Ca3 Sb2 148.0(9) 7_556 8_545 ? 
O4 Ca3 Sb2 84.0(8) . 8_545 ? 
O2 Ca3 Sb2 78.8(5) . 8_545 ? 
Sb2 Ca3 Sb2 66.4(5) 8 8_545 ? 
Sb2 Ca3 Sb2 4.71(10) 3_545 8_545 ? 
Ca4 Ca3 Sb2 74.0(10) 7_546 8_545 ? 
Ca4 Ca3 Sb2 110.5(13) 7_556 8_545 ? 
Sb2 Ca3 Sb2 71.1(5) 3 8_545 ? 
O3 Ca3 Gd2 101.1(11) 7_546 3 ? 
O3 Ca3 Gd2 42.5(6) 7_556 3 ? 
O4 Ca3 Gd2 147.6(3) . 3 ? 
O2 Ca3 Gd2 39.3(4) . 3 ? 
Sb2 Ca3 Gd2 81.5(4) 8 3 ? 
Sb2 Ca3 Gd2 113.6(7) 3_545 3 ? 
Ca4 Ca3 Gd2 168.9(13) 7_546 3 ? 
Ca4 Ca3 Gd2 114.0(5) 7_556 3 ? 
Sb2 Ca3 Gd2 79.0(4) 3 3 ? 
Sb2 Ca3 Gd2 115.5(7) 8_545 3 ? 
O3 Ca3 Gd2 42.5(6) 7_546 3_545 ? 
O3 Ca3 Gd2 101.1(11) 7_556 3_545 ? 
O4 Ca3 Gd2 147.6(3) . 3_545 ? 
O2 Ca3 Gd2 39.3(4) . 3_545 ? 
Sb2 Ca3 Gd2 113.6(7) 8 3_545 ? 
Sb2 Ca3 Gd2 81.5(4) 3_545 3_545 ? 
Ca4 Ca3 Gd2 114.0(5) 7_546 3_545 ? 
Ca4 Ca3 Gd2 168.9(13) 7_556 3_545 ? 
Sb2 Ca3 Gd2 115.5(7) 3 3_545 ? 
Sb2 Ca3 Gd2 79.0(4) 8_545 3_545 ? 
Gd2 Ca3 Gd2 64.5(6) 3 3_545 ? 
O4 Gd3 O3 101.9(3) . 7_546 ? 
O4 Gd3 O3 101.9(3) . 7_556 ? 
O3 Gd3 O3 113.6(3) 7_546 7_556 ? 
O4 Gd3 O2 170.5(4) . . ? 
O3 Gd3 O2 83.1(2) 7_546 . ? 
O3 Gd3 O2 83.1(2) 7_556 . ? 
O4 Gd3 Sb2 87.5(3) . 8 ? 
O3 Gd3 Sb2 152.96(19) 7_546 8 ? 
O3 Gd3 Sb2 88.64(18) 7_556 8 ? 
O2 Gd3 Sb2 84.58(14) . 8 ? 
O4 Gd3 Sb2 87.5(3) . 3_545 ? 
O3 Gd3 Sb2 88.64(18) 7_546 3_545 ? 
O3 Gd3 Sb2 152.96(19) 7_556 3_545 ? 
O2 Gd3 Sb2 84.58(14) . 3_545 ? 
Sb2 Gd3 Sb2 66.24(12) 8 3_545 ? 
O4 Gd3 Sb2 87.6(3) . 3 ? 
O3 Gd3 Sb2 157.35(19) 7_546 3 ? 
O3 Gd3 Sb2 83.86(17) 7_556 3 ? 
O2 Gd3 Sb2 84.90(13) . 3 ? 
Sb2 Gd3 Sb2 4.86(10) 8 3 ? 
Sb2 Gd3 Sb2 71.10(4) 3_545 3 ? 
O4 Gd3 Sb2 87.6(3) . 8_545 ? 
O3 Gd3 Sb2 83.86(17) 7_546 8_545 ? 
O3 Gd3 Sb2 157.35(19) 7_556 8_545 ? 
O2 Gd3 Sb2 84.90(13) . 8_545 ? 
Sb2 Gd3 Sb2 71.10(4) 8 8_545 ? 
Sb2 Gd3 Sb2 4.86(10) 3_545 8_545 ? 
Sb2 Gd3 Sb2 75.96(10) 3 8_545 ? 
O4 Gd3 Gd2 144.71(12) . 3 ? 
O3 Gd3 Gd2 100.3(2) 7_546 3 ? 
O3 Gd3 Gd2 43.6(2) 7_556 3 ? 
O2 Gd3 Gd2 39.56(9) . 3 ? 
Sb2 Gd3 Gd2 85.08(5) 8 3 ? 
Sb2 Gd3 Gd2 120.25(5) 3_545 3 ? 
Sb2 Gd3 Gd2 82.23(5) 3 3 ? 
Sb2 Gd3 Gd2 121.92(5) 8_545 3 ? 
O4 Gd3 Gd2 144.71(12) . 3_545 ? 
O3 Gd3 Gd2 43.6(2) 7_546 3_545 ? 
O3 Gd3 Gd2 100.3(2) 7_556 3_545 ? 
O2 Gd3 Gd2 39.56(9) . 3_545 ? 
Sb2 Gd3 Gd2 120.25(5) 8 3_545 ? 
Sb2 Gd3 Gd2 85.08(5) 3_545 3_545 ? 
Sb2 Gd3 Gd2 121.92(5) 3 3_545 ? 
Sb2 Gd3 Gd2 82.23(5) 8_545 3_545 ? 
Gd2 Gd3 Gd2 65.29(4) 3 3_545 ? 
O4 Gd3 Ca2 146.97(16) . 3 ? 
O3 Gd3 Ca2 103.0(3) 7_546 3 ? 
O3 Gd3 Ca2 47.8(3) 7_556 3 ? 
O2 Gd3 Ca2 35.88(18) . 3 ? 
Sb2 Gd3 Ca2 80.1(2) 8 3 ? 
Sb2 Gd3 Ca2 114.5(2) 3_545 3 ? 
Sb2 Gd3 Ca2 77.5(2) 3 3 ? 
Sb2 Gd3 Ca2 116.3(2) 8_545 3 ? 
Gd2 Gd3 Ca2 6.2(2) 3 3 ? 
Gd2 Gd3 Ca2 65.41(14) 3_545 3 ? 
O4 Gd3 Ca2 146.97(16) . 3_545 ? 
O3 Gd3 Ca2 47.8(3) 7_546 3_545 ? 
O3 Gd3 Ca2 103.0(3) 7_556 3_545 ? 
O2 Gd3 Ca2 35.88(18) . 3_545 ? 
Sb2 Gd3 Ca2 114.5(2) 8 3_545 ? 
Sb2 Gd3 Ca2 80.1(2) 3_545 3_545 ? 
Sb2 Gd3 Ca2 116.3(2) 3 3_545 ? 
Sb2 Gd3 Ca2 77.5(2) 8_545 3_545 ? 
Gd2 Gd3 Ca2 65.41(14) 3 3_545 ? 
Gd2 Gd3 Ca2 6.2(2) 3_545 3_545 ? 
Ca2 Gd3 Ca2 64.8(3) 3 3_545 ? 
O4 Ca4 O4 128(3) 7_546 7_556 ? 
O4 Ca4 O2 107.0(16) 7_546 5_656 ? 
O4 Ca4 O2 107.0(16) 7_556 5_656 ? 
O4 Ca4 O5 84.5(16) 7_546 . ? 
O4 Ca4 O5 84.5(16) 7_556 . ? 
O2 Ca4 O5 151(2) 5_656 . ? 
O4 Ca4 Sb2 140.9(17) 7_546 7_556 ? 
O4 Ca4 Sb2 83.1(9) 7_556 7_556 ? 
O2 Ca4 Sb2 79.7(13) 5_656 7_556 ? 
O5 Ca4 Sb2 75.0(12) . 7_556 ? 
O4 Ca4 Sb2 83.1(9) 7_546 4_546 ? 
O4 Ca4 Sb2 140.9(17) 7_556 4_546 ? 
O2 Ca4 Sb2 79.7(13) 5_656 4_546 ? 
O5 Ca4 Sb2 75.0(12) . 4_546 ? 
Sb2 Ca4 Sb2 59.7(8) 7_556 4_546 ? 
O4 Ca4 Ca3 35.3(9) 7_546 7_546 ? 
O4 Ca4 Ca3 98.7(17) 7_556 7_546 ? 
O2 Ca4 Ca3 103.7(16) 5_656 7_546 ? 
O5 Ca4 Ca3 100.9(16) . 7_546 ? 
Sb2 Ca4 Ca3 175.4(17) 7_556 7_546 ? 
Sb2 Ca4 Ca3 117.5(3) 4_546 7_546 ? 
O4 Ca4 Ca3 98.7(17) 7_546 7_556 ? 
O4 Ca4 Ca3 35.3(9) 7_556 7_556 ? 
O2 Ca4 Ca3 103.7(16) 5_656 7_556 ? 
O5 Ca4 Ca3 100.9(16) . 7_556 ? 
Sb2 Ca4 Ca3 117.5(3) 7_556 7_556 ? 
Sb2 Ca4 Ca3 175.4(17) 4_546 7_556 ? 
Ca3 Ca4 Ca3 65.1(10) 7_546 7_556 ? 
O4 Ca4 Ca2 131(2) 7_546 7_556 ? 
O4 Ca4 Ca2 71.8(11) 7_556 7_556 ? 
O2 Ca4 Ca2 35.1(6) 5_656 7_556 ? 
O5 Ca4 Ca2 144.5(9) . 7_556 ? 
Sb2 Ca4 Ca2 76.2(8) 7_556 7_556 ? 
Sb2 Ca4 Ca2 107.2(14) 4_546 7_556 ? 
Ca3 Ca4 Ca2 108.4(15) 7_546 7_556 ? 
Ca3 Ca4 Ca2 74.8(9) 7_556 7_556 ? 
O4 Ca4 Ca2 71.8(11) 7_546 7_546 ? 
O4 Ca4 Ca2 131(2) 7_556 7_546 ? 
O2 Ca4 Ca2 35.1(6) 5_656 7_546 ? 
O5 Ca4 Ca2 144.5(9) . 7_546 ? 
Sb2 Ca4 Ca2 107.2(14) 7_556 7_546 ? 
Sb2 Ca4 Ca2 76.2(8) 4_546 7_546 ? 
Ca3 Ca4 Ca2 74.8(9) 7_546 7_546 ? 
Ca3 Ca4 Ca2 108.4(15) 7_556 7_546 ? 
Ca2 Ca4 Ca2 65.0(10) 7_556 7_546 ? 
O4 Ca4 Gd3 35.2(8) 7_546 7_546 ? 
O4 Ca4 Gd3 97.0(16) 7_556 7_546 ? 
O2 Ca4 Gd3 107.6(15) 5_656 7_546 ? 
O5 Ca4 Gd3 97.3(15) . 7_546 ? 
Sb2 Ca4 Gd3 172.2(17) 7_556 7_546 ? 
Sb2 Ca4 Gd3 118.1(2) 4_546 7_546 ? 
Ca3 Ca4 Gd3 3.9(4) 7_546 7_546 ? 
Ca3 Ca4 Gd3 64.1(9) 7_556 7_546 ? 
Ca2 Ca4 Gd3 111.3(14) 7_556 7_546 ? 
Ca2 Ca4 Gd3 78.6(8) 7_546 7_546 ? 
O4 Ca4 Gd3 97.0(16) 7_546 7_556 ? 
O4 Ca4 Gd3 35.2(8) 7_556 7_556 ? 
O2 Ca4 Gd3 107.6(15) 5_656 7_556 ? 
O5 Ca4 Gd3 97.3(15) . 7_556 ? 
Sb2 Ca4 Gd3 118.1(2) 7_556 7_556 ? 
Sb2 Ca4 Gd3 172.2(17) 4_546 7_556 ? 
Ca3 Ca4 Gd3 64.1(9) 7_546 7_556 ? 
Ca3 Ca4 Gd3 3.9(4) 7_556 7_556 ? 
Ca2 Ca4 Gd3 78.6(8) 7_556 7_556 ? 
Ca2 Ca4 Gd3 111.3(14) 7_546 7_556 ? 
Gd3 Ca4 Gd3 63.0(8) 7_546 7_556 ? 
O4 Gd4 O4 116.3(4) 7_546 7_556 ? 
O4 Gd4 O5 84.8(3) 7_546 . ? 
O4 Gd4 O5 84.8(3) 7_556 . ? 
O4 Gd4 O2 102.5(3) 7_546 5_656 ? 
O4 Gd4 O2 102.5(3) 7_556 5_656 ? 
O5 Gd4 O2 165.6(3) . 5_656 ? 
O4 Gd4 Sb2 151.3(2) 7_546 7_556 ? 
O4 Gd4 Sb2 87.9(2) 7_556 7_556 ? 
O5 Gd4 Sb2 82.28(16) . 7_556 ? 
O2 Gd4 Sb2 85.60(18) 5_656 7_556 ? 
O4 Gd4 Sb2 87.9(2) 7_546 4_546 ? 
O4 Gd4 Sb2 151.3(2) 7_556 4_546 ? 
O5 Gd4 Sb2 82.28(16) . 4_546 ? 
O2 Gd4 Sb2 85.60(18) 5_656 4_546 ? 
Sb2 Gd4 Sb2 65.15(11) 7_556 4_546 ? 
O4 Gd4 Sb2 155.8(2) 7_546 4_556 ? 
O4 Gd4 Sb2 83.1(2) 7_556 4_556 ? 
O5 Gd4 Sb2 82.72(15) . 4_556 ? 
O2 Gd4 Sb2 85.85(17) 5_656 4_556 ? 
Sb2 Gd4 Sb2 4.83(10) 7_556 4_556 ? 
Sb2 Gd4 Sb2 69.97(3) 4_546 4_556 ? 
O4 Gd4 Sb2 83.1(2) 7_546 7_546 ? 
O4 Gd4 Sb2 155.8(2) 7_556 7_546 ? 
O5 Gd4 Sb2 82.72(15) . 7_546 ? 
O2 Gd4 Sb2 85.85(17) 5_656 7_546 ? 
Sb2 Gd4 Sb2 69.97(3) 7_556 7_546 ? 
Sb2 Gd4 Sb2 4.83(10) 4_546 7_546 ? 
Sb2 Gd4 Sb2 74.80(10) 4_556 7_546 ? 
O4 Gd4 Ca5 103.3(4) 7_546 . ? 
O4 Gd4 Ca5 103.3(4) 7_556 . ? 
O5 Gd4 Ca5 35.7(5) . . ? 
O2 Gd4 Ca5 129.9(5) 5_656 . ? 
Sb2 Gd4 Ca5 53.5(4) 7_556 . ? 
Sb2 Gd4 Ca5 53.5(4) 4_546 . ? 
Sb2 Gd4 Ca5 55.9(3) 4_556 . ? 
Sb2 Gd4 Ca5 55.9(3) 7_546 . ? 
O4 Gd4 Ca2 122.9(4) 7_546 7_556 ? 
O4 Gd4 Ca2 69.3(4) 7_556 7_556 ? 
O5 Gd4 Ca2 148.13(14) . 7_556 ? 
O2 Gd4 Ca2 33.79(17) 5_656 7_556 ? 
Sb2 Gd4 Ca2 78.6(2) 7_556 7_556 ? 
Sb2 Gd4 Ca2 111.7(2) 4_546 7_556 ? 
Sb2 Gd4 Ca2 76.2(2) 4_556 7_556 ? 
Sb2 Gd4 Ca2 113.6(2) 7_546 7_556 ? 
Ca5 Gd4 Ca2 132.0(4) . 7_556 ? 
O4 Gd4 Ca2 69.3(4) 7_546 7_546 ? 
O4 Gd4 Ca2 122.9(4) 7_556 7_546 ? 
O5 Gd4 Ca2 148.13(14) . 7_546 ? 
O2 Gd4 Ca2 33.79(17) 5_656 7_546 ? 
Sb2 Gd4 Ca2 111.7(2) 7_556 7_546 ? 
Sb2 Gd4 Ca2 78.6(2) 4_546 7_546 ? 
Sb2 Gd4 Ca2 113.6(2) 4_556 7_546 ? 
Sb2 Gd4 Ca2 76.2(2) 7_546 7_546 ? 
Ca5 Gd4 Ca2 132.0(4) . 7_546 ? 
Ca2 Gd4 Ca2 63.6(3) 7_556 7_546 ? 
O4 Gd4 Gd5 49.2(3) 7_546 7_546 ? 
O4 Gd4 Gd5 103.5(3) 7_556 7_546 ? 
O5 Gd4 Gd5 35.78(9) . 7_546 ? 
O2 Gd4 Gd5 148.32(3) 5_656 7_546 ? 
Sb2 Gd4 Gd5 112.98(4) 7_556 7_546 ? 
Sb2 Gd4 Gd5 80.08(4) 4_546 7_546 ? 
Sb2 Gd4 Gd5 114.85(4) 4_556 7_546 ? 
Sb2 Gd4 Gd5 77.61(4) 7_546 7_546 ? 
Ca5 Gd4 Gd5 59.6(4) . 7_546 ? 
Ca2 Gd4 Gd5 166.7(2) 7_556 7_546 ? 
Ca2 Gd4 Gd5 115.00(14) 7_546 7_546 ? 
O5 Ca5 O5 76.5(7) . 7_546 ? 
O5 Ca5 O5 76.5(7) . 7_556 ? 
O5 Ca5 O5 104.3(12) 7_546 7_556 ? 
O5 Ca5 Sb2 89.8(11) . 7_556 ? 
O5 Ca5 Sb2 156.5(14) 7_546 7_556 ? 
O5 Ca5 Sb2 90.6(4) 7_556 7_556 ? 
O5 Ca5 Sb2 89.8(11) . 4_546 ? 
O5 Ca5 Sb2 90.6(4) 7_546 4_546 ? 
O5 Ca5 Sb2 156.5(14) 7_556 4_546 ? 
Sb2 Ca5 Sb2 70.1(8) 7_556 4_546 ? 
O5 Ca5 Sb2 89.8(10) . 4_556 ? 
O5 Ca5 Sb2 160.2(14) 7_546 4_556 ? 
O5 Ca5 Sb2 85.8(4) 7_556 4_556 ? 
Sb2 Ca5 Sb2 4.96(11) 7_556 4_556 ? 
Sb2 Ca5 Sb2 75.0(8) 4_546 4_556 ? 
O5 Ca5 Sb2 89.8(10) . 7_546 ? 
O5 Ca5 Sb2 85.8(4) 7_546 7_546 ? 
O5 Ca5 Sb2 160.2(14) 7_556 7_546 ? 
Sb2 Ca5 Sb2 75.0(8) 7_556 7_546 ? 
Sb2 Ca5 Sb2 4.96(11) 4_546 7_546 ? 
Sb2 Ca5 Sb2 80.0(8) 4_556 7_546 ? 
O5 Ca5 Sb2 149.6(3) . 8 ? 
O5 Ca5 Sb2 124.7(13) 7_546 8 ? 
O5 Ca5 Sb2 76.9(6) 7_556 8 ? 
Sb2 Ca5 Sb2 75.9(4) 7_556 8 ? 
Sb2 Ca5 Sb2 109.6(8) 4_546 8 ? 
Sb2 Ca5 Sb2 73.7(4) 4_556 8 ? 
Sb2 Ca5 Sb2 111.5(8) 7_546 8 ? 
O5 Ca5 Sb2 149.6(3) . 3_545 ? 
O5 Ca5 Sb2 76.9(6) 7_546 3_545 ? 
O5 Ca5 Sb2 124.7(13) 7_556 3_545 ? 
Sb2 Ca5 Sb2 109.6(8) 7_556 3_545 ? 
Sb2 Ca5 Sb2 75.9(4) 4_546 3_545 ? 
Sb2 Ca5 Sb2 111.5(8) 4_556 3_545 ? 
Sb2 Ca5 Sb2 73.7(4) 7_546 3_545 ? 
Sb2 Ca5 Sb2 60.5(5) 8 3_545 ? 
O5 Ca5 Gd4 38.7(7) . . ? 
O5 Ca5 Gd4 99.9(9) 7_546 . ? 
O5 Ca5 Gd4 99.9(9) 7_556 . ? 
Sb2 Ca5 Gd4 59.0(7) 7_556 . ? 
Sb2 Ca5 Gd4 59.0(7) 4_546 . ? 
Sb2 Ca5 Gd4 61.2(6) 4_556 . ? 
Sb2 Ca5 Gd4 61.2(6) 7_546 . ? 
Sb2 Ca5 Gd4 134.9(8) 8 . ? 
Sb2 Ca5 Gd4 134.9(8) 3_545 . ? 
O5 Ca5 Gd5 36.8(3) . 7_546 ? 
O5 Ca5 Gd5 40.4(4) 7_546 7_546 ? 
O5 Ca5 Gd5 95.1(8) 7_556 7_546 ? 
Sb2 Ca5 Gd5 121.4(11) 7_556 7_546 ? 
Sb2 Ca5 Gd5 84.5(6) 4_546 7_546 ? 
Sb2 Ca5 Gd5 123.0(11) 4_556 7_546 ? 
Sb2 Ca5 Gd5 81.6(5) 7_546 7_546 ? 
Sb2 Ca5 Gd5 161.4(12) 8 7_546 ? 
Sb2 Ca5 Gd5 114.0(3) 3_545 7_546 ? 
Gd4 Ca5 Gd5 62.6(5) . 7_546 ? 
O5 Ca5 Gd5 36.8(3) . 7_556 ? 
O5 Ca5 Gd5 95.1(8) 7_546 7_556 ? 
O5 Ca5 Gd5 40.4(4) 7_556 7_556 ? 
Sb2 Ca5 Gd5 84.5(6) 7_556 7_556 ? 
Sb2 Ca5 Gd5 121.4(11) 4_546 7_556 ? 
Sb2 Ca5 Gd5 81.6(5) 4_556 7_556 ? 
Sb2 Ca5 Gd5 123.0(11) 7_546 7_556 ? 
Sb2 Ca5 Gd5 114.0(3) 8 7_556 ? 
Sb2 Ca5 Gd5 161.4(12) 3_545 7_556 ? 
Gd4 Ca5 Gd5 62.6(5) . 7_556 ? 
Gd5 Ca5 Gd5 65.1(5) 7_546 7_556 ? 
O5 Gd5 O5 116.2(3) 7_546 7_556 ? 
O5 Gd5 O5 76.0(2) 7_546 . ? 
O5 Gd5 O5 76.0(2) 7_556 . ? 
O5 Gd5 O4 73.8(2) 7_546 . ? 
O5 Gd5 O4 73.8(2) 7_556 . ? 
O5 Gd5 O4 120.7(3) . . ? 
O5 Gd5 Sb2 138.98(19) 7_546 8 ? 
O5 Gd5 Sb2 82.14(18) 7_556 8 ? 
O5 Gd5 Sb2 144.89(9) . 8 ? 
O4 Gd5 Sb2 77.53(18) . 8 ? 
O5 Gd5 Sb2 82.14(18) 7_546 3_545 ? 
O5 Gd5 Sb2 138.98(19) 7_556 3_545 ? 
O5 Gd5 Sb2 144.89(9) . 3_545 ? 
O4 Gd5 Sb2 77.53(17) . 3_545 ? 
Sb2 Gd5 Sb2 63.33(11) 8 3_545 ? 
O5 Gd5 Sb2 140.63(19) 7_546 7_556 ? 
O5 Gd5 Sb2 84.55(17) 7_556 7_556 ? 
O5 Gd5 Sb2 77.68(16) . 7_556 ? 
O4 Gd5 Sb2 145.55(10) . 7_556 ? 
Sb2 Gd5 Sb2 73.17(6) 8 7_556 ? 
Sb2 Gd5 Sb2 104.31(6) 3_545 7_556 ? 
O5 Gd5 Sb2 84.55(17) 7_546 4_546 ? 
O5 Gd5 Sb2 140.63(19) 7_556 4_546 ? 
O5 Gd5 Sb2 77.68(16) . 4_546 ? 
O4 Gd5 Sb2 145.55(10) . 4_546 ? 
Sb2 Gd5 Sb2 104.31(6) 8 4_546 ? 
Sb2 Gd5 Sb2 73.17(6) 3_545 4_546 ? 
Sb2 Gd5 Sb2 61.50(11) 7_556 4_546 ? 
O5 Gd5 Sb2 142.76(19) 7_546 3 ? 
O5 Gd5 Sb2 77.75(18) 7_556 3 ? 
O5 Gd5 Sb2 140.65(8) . 3 ? 
O4 Gd5 Sb2 78.22(17) . 3 ? 
Sb2 Gd5 Sb2 4.77(10) 8 3 ? 
Sb2 Gd5 Sb2 68.09(3) 3_545 3 ? 
Sb2 Gd5 Sb2 71.11(4) 7_556 3 ? 
Sb2 Gd5 Sb2 106.47(3) 4_546 3 ? 
O5 Gd5 Sb2 77.75(18) 7_546 8_545 ? 
O5 Gd5 Sb2 142.76(19) 7_556 8_545 ? 
O5 Gd5 Sb2 140.65(8) . 8_545 ? 
O4 Gd5 Sb2 78.22(16) . 8_545 ? 
Sb2 Gd5 Sb2 68.09(3) 8 8_545 ? 
Sb2 Gd5 Sb2 4.77(10) 3_545 8_545 ? 
Sb2 Gd5 Sb2 106.47(3) 7_556 8_545 ? 
Sb2 Gd5 Sb2 71.11(4) 4_546 8_545 ? 
Sb2 Gd5 Sb2 72.86(10) 3 8_545 ? 
O5 Gd5 Ca5 34.2(4) 7_546 7_546 ? 
O5 Gd5 Ca5 94.9(3) 7_556 7_546 ? 
O5 Gd5 Ca5 42.5(5) . 7_546 ? 
O4 Gd5 Ca5 91.4(7) . 7_546 ? 
Sb2 Gd5 Ca5 169.0(6) 8 7_546 ? 
Sb2 Gd5 Ca5 114.6(3) 3_545 7_546 ? 
Sb2 Gd5 Ca5 117.3(6) 7_556 7_546 ? 
Sb2 Gd5 Ca5 84.7(5) 4_546 7_546 ? 
Sb2 Gd5 Ca5 168.6(6) 3 7_546 ? 
Sb2 Gd5 Ca5 110.0(3) 8_545 7_546 ? 
O5 Gd5 Ca5 94.9(3) 7_546 7_556 ? 
O5 Gd5 Ca5 34.2(4) 7_556 7_556 ? 
O5 Gd5 Ca5 42.5(5) . 7_556 ? 
O4 Gd5 Ca5 91.4(7) . 7_556 ? 
Sb2 Gd5 Ca5 114.6(3) 8 7_556 ? 
Sb2 Gd5 Ca5 169.0(6) 3_545 7_556 ? 
Sb2 Gd5 Ca5 84.7(5) 7_556 7_556 ? 
Sb2 Gd5 Ca5 117.3(6) 4_546 7_556 ? 
Sb2 Gd5 Ca5 110.0(3) 3 7_556 ? 
Sb2 Gd5 Ca5 168.6(6) 8_545 7_556 ? 
Ca5 Gd5 Ca5 65.1(5) 7_546 7_556 ? 
Gd2 Sb1 Gd2 180.00(5) 5 1_565 ? 
Gd2 Sb1 Gd2 72.11(3) 5 5_565 ? 
Gd2 Sb1 Gd2 107.89(3) 1_565 5_565 ? 
Gd2 Sb1 Gd2 107.89(3) 5 . ? 
Gd2 Sb1 Gd2 72.11(3) 1_565 . ? 
Gd2 Sb1 Gd2 180.00(3) 5_565 . ? 
Gd2 Sb1 Gd1 110.41(4) 5 5_665 ? 
Gd2 Sb1 Gd1 69.59(4) 1_565 5_665 ? 
Gd2 Sb1 Gd1 69.96(5) 5_565 5_665 ? 
Gd2 Sb1 Gd1 110.04(5) . 5_665 ? 
Gd2 Sb1 Gd1 69.59(4) 5 1_455 ? 
Gd2 Sb1 Gd1 110.41(4) 1_565 1_455 ? 
Gd2 Sb1 Gd1 110.04(5) 5_565 1_455 ? 
Gd2 Sb1 Gd1 69.96(5) . 1_455 ? 
Gd1 Sb1 Gd1 180.00(6) 5_665 1_455 ? 
Gd2 Sb1 Gd1 69.96(5) 5 5_655 ? 
Gd2 Sb1 Gd1 110.04(5) 1_565 5_655 ? 
Gd2 Sb1 Gd1 110.41(4) 5_565 5_655 ? 
Gd2 Sb1 Gd1 69.59(4) . 5_655 ? 
Gd1 Sb1 Gd1 71.94(5) 5_665 5_655 ? 
Gd1 Sb1 Gd1 108.06(5) 1_455 5_655 ? 
Gd2 Sb1 Gd1 110.04(5) 5 1_465 ? 
Gd2 Sb1 Gd1 69.96(5) 1_565 1_465 ? 
Gd2 Sb1 Gd1 69.59(4) 5_565 1_465 ? 
Gd2 Sb1 Gd1 110.41(4) . 1_465 ? 
Gd1 Sb1 Gd1 108.06(5) 5_665 1_465 ? 
Gd1 Sb1 Gd1 71.94(5) 1_455 1_465 ? 
Gd1 Sb1 Gd1 180.00(6) 5_655 1_465 ? 
Gd2 Sb1 Ca1 72.6(3) 5 1_455 ? 
Gd2 Sb1 Ca1 107.4(3) 1_565 1_455 ? 
Gd2 Sb1 Ca1 111.3(4) 5_565 1_455 ? 
Gd2 Sb1 Ca1 68.7(4) . 1_455 ? 
Gd1 Sb1 Ca1 177.0(3) 5_665 1_455 ? 
Gd1 Sb1 Ca1 3.0(3) 1_455 1_455 ? 
Gd1 Sb1 Ca1 109.8(2) 5_655 1_455 ? 
Gd1 Sb1 Ca1 70.2(2) 1_465 1_455 ? 
Gd2 Sb1 Ca1 107.4(3) 5 5_665 ? 
Gd2 Sb1 Ca1 72.6(3) 1_565 5_665 ? 
Gd2 Sb1 Ca1 68.7(4) 5_565 5_665 ? 
Gd2 Sb1 Ca1 111.3(4) . 5_665 ? 
Gd1 Sb1 Ca1 3.0(3) 5_665 5_665 ? 
Gd1 Sb1 Ca1 177.0(3) 1_455 5_665 ? 
Gd1 Sb1 Ca1 70.2(2) 5_655 5_665 ? 
Gd1 Sb1 Ca1 109.8(2) 1_465 5_665 ? 
Ca1 Sb1 Ca1 180.0(6) 1_455 5_665 ? 
Gd2 Sb1 Ca1 68.7(4) 5 5_655 ? 
Gd2 Sb1 Ca1 111.3(4) 1_565 5_655 ? 
Gd2 Sb1 Ca1 107.4(3) 5_565 5_655 ? 
Gd2 Sb1 Ca1 72.6(3) . 5_655 ? 
Gd1 Sb1 Ca1 70.2(2) 5_665 5_655 ? 
Gd1 Sb1 Ca1 109.8(2) 1_455 5_655 ? 
Gd1 Sb1 Ca1 3.0(3) 5_655 5_655 ? 
Gd1 Sb1 Ca1 177.0(3) 1_465 5_655 ? 
Ca1 Sb1 Ca1 111.6(4) 1_455 5_655 ? 
Ca1 Sb1 Ca1 68.4(4) 5_665 5_655 ? 
Gd2 Sb1 Ca1 111.3(4) 5 1_465 ? 
Gd2 Sb1 Ca1 68.7(4) 1_565 1_465 ? 
Gd2 Sb1 Ca1 72.6(3) 5_565 1_465 ? 
Gd2 Sb1 Ca1 107.4(3) . 1_465 ? 
Gd1 Sb1 Ca1 109.8(2) 5_665 1_465 ? 
Gd1 Sb1 Ca1 70.2(2) 1_455 1_465 ? 
Gd1 Sb1 Ca1 177.0(3) 5_655 1_465 ? 
Gd1 Sb1 Ca1 3.0(3) 1_465 1_465 ? 
Ca1 Sb1 Ca1 68.4(4) 1_455 1_465 ? 
Ca1 Sb1 Ca1 111.6(4) 5_665 1_465 ? 
Ca1 Sb1 Ca1 180.0(7) 5_655 1_465 ? 
Ca5 Sb2 Gd3 111.4(4) 7_556 3_455 ? 
Ca5 Sb2 Gd4 67.5(6) 7_556 7_556 ? 
Gd3 Sb2 Gd4 71.18(6) 3_455 7_556 ? 
Ca5 Sb2 Ca5 75.0(8) 7_556 7_546 ? 
Gd3 Sb2 Ca5 170.4(5) 3_455 7_546 ? 
Gd4 Sb2 Ca5 106.1(4) 7_556 7_546 ? 
Ca5 Sb2 Gd5 76.0(5) 7_556 3_455 ? 
Gd3 Sb2 Gd5 75.91(7) 3_455 3_455 ? 
Gd4 Sb2 Gd5 115.75(11) 7_556 3_455 ? 
Ca5 Sb2 Gd5 113.2(5) 7_546 3_455 ? 
Ca5 Sb2 Gd3 172.6(5) 7_556 3_445 ? 
Gd3 Sb2 Gd3 71.10(4) 3_455 3_445 ? 
Gd4 Sb2 Gd3 107.73(5) 7_556 3_445 ? 
Ca5 Sb2 Gd3 101.6(4) 7_546 3_445 ? 
Gd5 Sb2 Gd3 111.33(4) 3_455 3_445 ? 
Ca5 Sb2 Ca3 113.9(5) 7_556 3_455 ? 
Gd3 Sb2 Ca3 2.9(4) 3_455 3_455 ? 
Gd4 Sb2 Ca3 73.9(5) 7_556 3_455 ? 
Ca5 Sb2 Ca3 169.5(6) 7_546 3_455 ? 
Gd5 Sb2 Ca3 75.4(5) 3_455 3_455 ? 
Gd3 Sb2 Ca3 68.9(2) 3_445 3_455 ? 
Ca5 Sb2 Gd5 5.1(5) 7_556 7_556 ? 
Gd3 Sb2 Gd5 115.95(11) 3_455 7_556 ? 
Gd4 Sb2 Gd5 71.87(6) 7_556 7_556 ? 
Ca5 Sb2 Gd5 70.8(4) 7_546 7_556 ? 
Gd5 Sb2 Gd5 75.69(6) 3_455 7_556 ? 
Gd3 Sb2 Gd5 171.61(9) 3_445 7_556 ? 
Ca3 Sb2 Gd5 118.3(2) 3_455 7_556 ? 
Ca5 Sb2 Gd4 106.2(5) 7_556 7_546 ? 
Gd3 Sb2 Gd4 107.77(5) 3_455 7_546 ? 
Gd4 Sb2 Gd4 69.97(3) 7_556 7_546 ? 
Ca5 Sb2 Gd4 62.9(6) 7_546 7_546 ? 
Gd5 Sb2 Gd4 174.18(10) 3_455 7_546 ? 
Gd3 Sb2 Gd4 66.49(6) 3_445 7_546 ? 
Ca3 Sb2 Gd4 108.1(5) 3_455 7_546 ? 
Gd5 Sb2 Gd4 106.06(4) 7_556 7_546 ? 
Ca5 Sb2 Ca5 70.4(8) 7_556 3_455 ? 
Gd3 Sb2 Ca5 82.9(6) 3_455 3_455 ? 
Gd4 Sb2 Ca5 116.5(3) 7_556 3_455 ? 
Ca5 Sb2 Ca5 106.3(4) 7_546 3_455 ? 
Gd5 Sb2 Ca5 7.6(6) 3_455 3_455 ? 
Gd3 Sb2 Ca5 117.0(5) 3_445 3_455 ? 
Ca3 Sb2 Ca5 82.6(7) 3_455 3_455 ? 
Gd5 Sb2 Ca5 69.6(5) 7_556 3_455 ? 
Gd4 Sb2 Ca5 169.1(5) 7_546 3_455 ? 
Ca5 Sb2 Ca4 69.7(10) 7_556 7_556 ? 
Gd3 Sb2 Ca4 71.6(8) 3_455 7_556 ? 
Gd4 Sb2 Ca4 2.9(5) 7_556 7_556 ? 
Ca5 Sb2 Ca4 105.2(9) 7_546 7_556 ? 
Gd5 Sb2 Ca4 118.5(4) 3_455 7_556 ? 
Gd3 Sb2 Ca4 105.4(8) 3_445 7_556 ? 
Ca3 Sb2 Ca4 74.2(9) 3_455 7_556 ? 
Gd5 Sb2 Ca4 73.9(8) 7_556 7_556 ? 
Gd4 Sb2 Ca4 67.2(4) 7_546 7_556 ? 
Ca5 Sb2 Ca4 119.3(5) 3_455 7_556 ? 
Ca5 Sb2 Gd5 113.4(6) 7_556 3_445 ? 
Gd3 Sb2 Gd5 111.43(4) 3_455 3_445 ? 
Gd4 Sb2 Gd5 176.02(10) 7_556 3_445 ? 
Ca5 Sb2 Gd5 70.8(4) 7_546 3_445 ? 
Gd5 Sb2 Gd5 68.09(3) 3_455 3_445 ? 
Gd3 Sb2 Gd5 70.92(7) 3_445 3_445 ? 
Ca3 Sb2 Gd5 108.7(5) 3_455 3_445 ? 
Gd5 Sb2 Gd5 108.89(4) 7_556 3_445 ? 
Gd4 Sb2 Gd5 106.16(10) 7_546 3_445 ? 
Ca5 Sb2 Gd5 67.2(2) 3_455 3_445 ? 
Ca4 Sb2 Gd5 173.4(4) 7_556 3_445 ? 
Ca1 O1 Ca1 118.0(12) 3_455 3_445 ? 
Ca1 O1 Ca2 111.9(5) 3_455 . ? 
Ca1 O1 Ca2 111.9(5) 3_445 . ? 
Ca1 O1 Gd1 5.7(5) 3_455 3_455 ? 
Ca1 O1 Gd1 116.1(6) 3_445 3_455 ? 
Ca2 O1 Gd1 117.0(2) . 3_455 ? 
Ca1 O1 Gd1 116.1(6) 3_455 3_445 ? 
Ca1 O1 Gd1 5.7(5) 3_445 3_445 ? 
Ca2 O1 Gd1 117.0(2) . 3_445 ? 
Gd1 O1 Gd1 113.7(4) 3_455 3_445 ? 
Ca1 O1 Gd2 115.3(5) 3_455 . ? 
Ca1 O1 Gd2 115.3(5) 3_445 . ? 
Ca2 O1 Gd2 9.7(4) . . ? 
Gd1 O1 Gd2 119.95(18) 3_455 . ? 
Gd1 O1 Gd2 119.95(18) 3_445 . ? 
Ca1 O1 Gd1 100.6(6) 3_455 5_655 ? 
Ca1 O1 Gd1 100.6(6) 3_445 5_655 ? 
Ca2 O1 Gd1 112.7(5) . 5_655 ? 
Gd1 O1 Gd1 96.0(2) 3_455 5_655 ? 
Gd1 O1 Gd1 96.0(2) 3_445 5_655 ? 
Gd2 O1 Gd1 103.0(3) . 5_655 ? 
Ca1 O1 Ca1 99.0(7) 3_455 5_655 ? 
Ca1 O1 Ca1 99.0(7) 3_445 5_655 ? 
Ca2 O1 Ca1 116.0(8) . 5_655 ? 
Gd1 O1 Ca1 94.2(3) 3_455 5_655 ? 
Gd1 O1 Ca1 94.2(3) 3_445 5_655 ? 
Gd2 O1 Ca1 106.3(6) . 5_655 ? 
Gd1 O1 Ca1 3.3(6) 5_655 5_655 ? 
Ca2 O2 Ca2 126.6(8) 3_545 3 ? 
Ca2 O2 Gd2 9.4(4) 3_545 3_545 ? 
Ca2 O2 Gd2 120.9(5) 3 3_545 ? 
Ca2 O2 Gd2 120.9(5) 3_545 3 ? 
Ca2 O2 Gd2 9.4(4) 3 3 ? 
Gd2 O2 Gd2 114.2(3) 3_545 3 ? 
Ca2 O2 Ca4 106.8(7) 3_545 5_656 ? 
Ca2 O2 Ca4 106.8(7) 3 5_656 ? 
Gd2 O2 Ca4 116.2(5) 3_545 5_656 ? 
Gd2 O2 Ca4 116.2(5) 3 5_656 ? 
Ca2 O2 Gd4 109.4(4) 3_545 5_656 ? 
Ca2 O2 Gd4 109.4(4) 3 5_656 ? 
Gd2 O2 Gd4 118.69(18) 3_545 5_656 ? 
Gd2 O2 Gd4 118.69(18) 3 5_656 ? 
Ca4 O2 Gd4 7.9(12) 5_656 5_656 ? 
Ca2 O2 Gd3 102.3(5) 3_545 . ? 
Ca2 O2 Gd3 102.3(5) 3 . ? 
Gd2 O2 Gd3 97.5(2) 3_545 . ? 
Gd2 O2 Gd3 97.5(2) 3 . ? 
Ca4 O2 Gd3 111.9(13) 5_656 . ? 
Gd4 O2 Gd3 104.0(3) 5_656 . ? 
Ca2 O2 Ca3 100.2(6) 3_545 . ? 
Ca2 O2 Ca3 100.2(6) 3 . ? 
Gd2 O2 Ca3 94.7(4) 3_545 . ? 
Gd2 O2 Ca3 94.7(4) 3 . ? 
Ca4 O2 Ca3 117.0(14) 5_656 . ? 
Gd4 O2 Ca3 109.1(7) 5_656 . ? 
Gd3 O2 Ca3 5.1(6) . . ? 
Ca3 O3 Ca3 121.4(14) 7_546 7_556 ? 
Ca3 O3 Ca1 112.3(6) 7_546 5_656 ? 
Ca3 O3 Ca1 112.3(7) 7_556 5_656 ? 
Ca3 O3 Gd3 6.4(6) 7_546 7_546 ? 
Ca3 O3 Gd3 117.8(7) 7_556 7_546 ? 
Ca1 O3 Gd3 118.5(3) 5_656 7_546 ? 
Ca3 O3 Gd3 117.8(7) 7_546 7_556 ? 
Ca3 O3 Gd3 6.4(6) 7_556 7_556 ? 
Ca1 O3 Gd3 118.5(3) 5_656 7_556 ? 
Gd3 O3 Gd3 113.6(3) 7_546 7_556 ? 
Ca3 O3 Gd1 113.8(6) 7_546 5_656 ? 
Ca3 O3 Gd1 113.8(6) 7_556 5_656 ? 
Ca1 O3 Gd1 4.9(6) 5_656 5_656 ? 
Gd3 O3 Gd1 119.88(19) 7_546 5_656 ? 
Gd3 O3 Gd1 119.88(19) 7_556 5_656 ? 
Ca3 O3 Gd2 100.6(8) 7_546 5_556 ? 
Ca3 O3 Gd2 100.6(8) 7_556 5_556 ? 
Ca1 O3 Gd2 107.3(6) 5_656 5_556 ? 
Gd3 O3 Gd2 96.6(2) 7_546 5_556 ? 
Gd3 O3 Gd2 96.6(2) 7_556 5_556 ? 
Gd1 O3 Gd2 102.4(3) 5_656 5_556 ? 
Ca3 O3 Ca2 97.0(8) 7_546 5_556 ? 
Ca3 O3 Ca2 97.0(8) 7_556 5_556 ? 
Ca1 O3 Ca2 114.9(7) 5_656 5_556 ? 
Gd3 O3 Ca2 92.4(3) 7_546 5_556 ? 
Gd3 O3 Ca2 92.4(3) 7_556 5_556 ? 
Gd1 O3 Ca2 110.1(5) 5_656 5_556 ? 
Gd2 O3 Ca2 7.6(3) 5_556 5_556 ? 
Ca4 O4 Ca4 128(3) 7_546 7_556 ? 
Ca4 O4 Ca3 110.7(13) 7_546 . ? 
Ca4 O4 Ca3 110.7(13) 7_556 . ? 
Ca4 O4 Gd4 7.6(13) 7_546 7_546 ? 
Ca4 O4 Gd4 122.5(13) 7_556 7_546 ? 
Ca3 O4 Gd4 118.2(3) . 7_546 ? 
Ca4 O4 Gd4 122.5(13) 7_546 7_556 ? 
Ca4 O4 Gd4 7.6(13) 7_556 7_556 ? 
Ca3 O4 Gd4 118.2(3) . 7_556 ? 
Gd4 O4 Gd4 116.3(4) 7_546 7_556 ? 
Ca4 O4 Gd3 112.3(13) 7_546 . ? 
Ca4 O4 Gd3 112.3(13) 7_556 . ? 
Ca3 O4 Gd3 6.5(7) . . ? 
Gd4 O4 Gd3 119.7(2) 7_546 . ? 
Gd4 O4 Gd3 119.7(2) 7_556 . ? 
Ca4 O4 Gd5 96.6(15) 7_546 . ? 
Ca4 O4 Gd5 96.6(15) 7_556 . ? 
Ca3 O4 Gd5 110.8(8) . . ? 
Gd4 O4 Gd5 92.9(3) 7_546 . ? 
Gd4 O4 Gd5 92.9(3) 7_556 . ? 
Gd3 O4 Gd5 104.2(4) . . ? 
Ca5 O5 Gd5 109.1(5) . 7_546 ? 
Ca5 O5 Gd5 109.1(5) . 7_556 ? 
Gd5 O5 Gd5 116.2(3) 7_546 7_556 ? 
Ca5 O5 Gd4 105.5(10) . . ? 
Gd5 O5 Gd4 108.2(2) 7_546 . ? 
Gd5 O5 Gd4 108.2(2) 7_556 . ? 
Ca5 O5 Gd5 10.8(10) . . ? 
Gd5 O5 Gd5 104.0(2) 7_546 . ? 
Gd5 O5 Gd5 104.0(2) 7_556 . ? 
Gd4 O5 Gd5 116.4(3) . . ? 
Ca5 O5 Ca4 112.6(15) . . ? 
Gd5 O5 Ca4 104.9(6) 7_546 . ? 
Gd5 O5 Ca4 104.9(6) 7_556 . ? 
Gd4 O5 Ca4 7.1(12) . . ? 
Gd5 O5 Ca4 123.5(12) . . ? 
Ca5 O5 Ca5 103.5(7) . 7_546 ? 
Gd5 O5 Ca5 10.7(8) 7_546 7_546 ? 
Gd5 O5 Ca5 111.0(6) 7_556 7_546 ? 
Gd4 O5 Ca5 118.9(8) . 7_546 ? 
Gd5 O5 Ca5 97.1(8) . 7_546 ? 
Ca4 O5 Ca5 115.7(10) . 7_546 ? 
Ca5 O5 Ca5 103.5(7) . 7_556 ? 
Gd5 O5 Ca5 111.0(6) 7_546 7_556 ? 
Gd5 O5 Ca5 10.7(8) 7_556 7_556 ? 
Gd4 O5 Ca5 118.9(8) . 7_556 ? 
Gd5 O5 Ca5 97.1(8) . 7_556 ? 
Ca4 O5 Ca5 115.7(10) . 7_556 ? 
Ca5 O5 Ca5 104.3(12) 7_546 7_556 ? 
 
_diffrn_measured_fraction_theta_max    0.995 
_diffrn_reflns_theta_full              34.56 
_diffrn_measured_fraction_theta_full   0.995 
_refine_diff_density_max    2.759 
_refine_diff_density_min   -3.106 
_refine_diff_density_rms    0.490 
